# Supplementary material for: Neurodevelopmental Outcomes of Normocephalic Colombian Children with Antenatal Zika Virus Exposure at School Entry
Source: MDPI journal article supplement (doi:10.3390/pathogens13020170), 2024-02-13
Supplement: s1 [file s1]

**Supplementary Table S1:** Nonspecific imaging findings from infant head ultrasound or brain MRI in ZIKV-exposed cases (N=17).

| Child | Type of Imaging | Finding                                      |
|-------|-----------------|----------------------------------------------|
| 1     | US              | CPC (U)                                      |
| 2     | US              | GM cyst (U)                                  |
| 3     | US              | GM cysts (B)                                 |
| 4     | US              | GM cysts (B)                                 |
| 5     | US/MRI          | GM cyst (U)                                  |
| 6     | MRI             | Minimal blood products in choroid plexus     |
| 7     | MRI             | Punctate white matter hemorrhage (U)         |
| 8     | US              | LSV                                          |
| 9     | US              | LSV                                          |
| 10    | US              | CPC (U); LSV                                 |
| 11    | US              | CPC (U)                                      |
| 12    | US              | Small frontal cyst (U)                       |
| 13    | US              | CPC (U); LSV                                 |
| 14    | MRI             | Punctate lesion in parietal white matter (U) |
| 15    | US              | CPC (U)                                      |
| 16    | US              | CPC, GM cyst (U)                             |
| 17    | US              | GM cyst (U)                                  |

US: ultrasound, MRI: magnetic resonance imaging, U: unilateral finding, B: Bilateral finding, CPC: choroid plexus cyst, LSV: lenticulostriate vasculopathy, GM: germinal matrix

**Supplementary Table S2:** Neurodevelopmental outcomes at age 4-5 years in ZIKV-exposed cases with and without infant mild neuroimaging findings.

|                                         | Mild nonspecific<br>imaging findings<br>(N=17) | Normal imaging<br>(N=23) | p-value, FDR |
|-----------------------------------------|------------------------------------------------|--------------------------|--------------|
| <b>BRIEF T-Score: Mean (SD)</b>         |                                                |                          |              |
| Inhibit                                 | 51.6 (9.8)                                     | 51.0 (9.1)               | 0.843        |
| Emotional Control                       | 51.1 (8.8)                                     | 52.3 (8.4)               | 0.843        |
| Shift                                   | 52.6 (10.0)                                    | 53.5 (10.0)              | 0.843        |
| Working Memory                          | 50.2 (8.2)                                     | 47.1 (10.3)              | 0.843        |
| Plan and Organize                       | 47.8 (5.8)                                     | 47.7 (6.8)               | 0.843        |
| Behavioral Regulation Index (ISCI/BRI)  | 51.2 (8.6)                                     | 50.6 (8.4)               | 0.843        |
| Emotional Regulation Index (FI/ERI)     | 51.8 (9.6)                                     | 54.3 (10.5)              | 0.843        |
| Cognitive Regulation Index (EMI/CRI)    | 49.1 (7.4)                                     | 47.6 (7.5)               | 0.843        |
| General Executive Composite             | 50.8 (8.6)                                     | 49.9 (7.9)               | 0.843        |
| <b>MABC Standard Score: Mean (SD)</b>   |                                                |                          |              |
| Manual Dexterity                        | 25.4 (7.8)                                     | 26.4 (6.0)               | 0.843        |
| Aiming and Catching                     | 23.8 (4.3)                                     | 22.4 (5.9)               | 0.843        |
| Balance                                 | 32.8 (5.4)                                     | 31.7 (5.2)               | 0.843        |
| Overall                                 | 83.4 (9.7)                                     | 80.7 (11.4)              | 0.843        |
| <b>PEDI-CAT Scaled Score: Mean (SD)</b> |                                                |                          |              |
| Mobility                                | 66.9 (4.0)                                     | 68.0 (4.7)               | 0.843        |
| Daily Activity                          | 57.9 (5.6)                                     | 59.0 (5.7)               | 1            |
| Responsibility                          | 43.5 (17.1)                                    | 48.7 (11.9)              | 1            |
| Social/Cognitive                        | 63.3 (3.8)                                     | 64.0 (4.8)               | 1            |
| <b>BSRA % Mastery: Mean (SD)</b>        |                                                |                          |              |
| Colors                                  | 70.6 (37.0)                                    | 79.5 (29.0)              | 1            |
| Letters                                 | 34.6 (24.3)                                    | 31.9 (15.9)              | 1            |
| Numbers                                 | 40.6 (28.2)                                    | 50.9 (25.3)              | 1            |
| Sizes and Comparisons                   | 55.2 (11.0)                                    | 59.0 (8.8)               | 1            |
| Shapes                                  | 48.4 (18.5)                                    | 48.4 (16.6)              | 1            |
| Total                                   | 48.7 (18.1)                                    | 52.8 (13.4)              | 1            |

BRIEF: Behavior Rating Inventory of Executive Function; BSRA: Bracken School Readiness Assessment; FDR: false discovery rate; SD: standard deviation; Movement ABC: Movement Assessment Battery for Children; PEDI-CAT: Pediatric Evaluation of Disability Inventory – Computer Adaptive Test. P-values adjusted for comparisons using the FDR.
